# Supplementary material for: Antibiotic and Nematocidal Metabolites from Two Lichen Species Collected on the Island of Lampedusa (Sicily)
Source: MDPI journal article supplement (doi:10.3390/ijms23158471), 2022-07-30
Supplement: s1 [file s1]

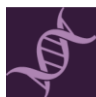

# Antibiotic and nematocidal metabolites from two lichen species collected on the island of Lampedusa (Sicily)

Jesús García Zorrilla<sup>1,2,\*</sup>, Trifone D'Addabbo<sup>3</sup>, Emanuela Roscetto<sup>4</sup>, Chiara Varriale<sup>4</sup>, Maria Rosaria Catania<sup>4</sup>, Maria Chiara Zonno<sup>5</sup>, Claudio Altomare<sup>5</sup>, Giuseppe Surico<sup>6</sup>, Pier Luigi Nimis<sup>7</sup>, Antonio Evidente<sup>1</sup>

<sup>1</sup> Department of Chemical Sciences, University of Naples "Federico II", Complesso Universitario Monte Sant' Angelo, Via Cintia 4, 80126 Napoli, Italy; [antonio.evidente@unina.it](mailto:antonio.evidente@unina.it) (A.E.)

<sup>2</sup> Allelopathy Group, Department of Organic Chemistry, Institute of Biomolecules (INBIO), School of Science, University of Cadiz, C/Republic Saharaui, s/n, 11510, Puerto Real, Cadiz, Spain

<sup>3</sup> Institute for Sustainable Plant Protection-CNR, Unit of Bari, via G. Amendola 122/d, Bari 70126, Italy. [trifone.daddabbo@ipsp.cnr.it](mailto:trifone.daddabbo@ipsp.cnr.it) (TD)

<sup>4</sup> Department of Molecular Medicine and Medical Biotechnologies, University of Naples Federico II, Via Pansini 5, 80131 Napoli, Italy; [emanuela.roschetto@unina.it](mailto:emanuela.roschetto@unina.it) (E.R.); [mariarosaria.catania@unina.it](mailto:mariarosaria.catania@unina.it) (M.R.C.); [chiaravarriale98@gmail.com](mailto:chiaravarriale98@gmail.com) (C.V.)

<sup>5</sup> Institute of Sciences of Food Production Sciences, National Research Council, Via Amendola 122/O, 70125 Bari, Italy; [mariachiara.zonno@ispa.cnr.it](mailto:mariachiara.zonno@ispa.cnr.it) (M.C.Z.); [claudio.altomare@ispa.cnr.it](mailto:claudio.altomare@ispa.cnr.it) (C.A.)

<sup>6</sup> Department of Agriculture, Food, Environment, and Forestry (DAGRI), Section of Agricultural Microbiology, Plant Pathology and Entomology, University of Florence, Italy Italy [giuseppe.surico@unifi.it](mailto:giuseppe.surico@unifi.it) (G.S.)

<sup>7</sup> Department of Life Sciences, University of Trieste, Via L. Giorgieri 10, 34127 Trieste, Italy; [nimis@units.it](mailto:nimis@units.it) (P.L.N.)

\* Correspondence: e-mail: [jesus.zorrilla@uca.es](mailto:jesus.zorrilla@uca.es) (J.G.Z.)



## Index

|                                                                                                                       |   |
|-----------------------------------------------------------------------------------------------------------------------|---|
| <b>Figure S1.</b> $^1\text{H}$ NMR spectrum (400 MHz) of (+)-usnic acid ( <b>1</b> ) in $\text{CDCl}_3$ .....         | 3 |
| <b>Figure S2.</b> ESI MS spectrum of (+)-usnic acid ( <b>1</b> ) recorded in positive mode .....                      | 3 |
| <b>Figure S3.</b> $^1\text{H}$ NMR spectrum (500 MHz) of methyl orsellinate ( <b>2</b> ) in $\text{CDCl}_3$ .....     | 4 |
| <b>Figure S4.</b> ESI MS spectrum of methyl orsellinate ( <b>2</b> ) recorded in positive mode .....                  | 4 |
| <b>Figure S5.</b> $^1\text{H}$ NMR spectrum (500 MHz) of orcinol ( <b>3</b> ) in $\text{CDCl}_3$ .....                | 5 |
| <b>Figure S6.</b> ESI MS spectrum of orcinol ( <b>3</b> ) recorded in positive mode .....                             | 5 |
| <b>Figure S7.</b> $^1\text{H}$ NMR spectrum (400 MHz) of (+)-montagnetol ( <b>4</b> ) in $\text{CD}_3\text{OD}$ ..... | 6 |
| <b>Figure S8.</b> ESI MS spectrum of (+)-montagnetol ( <b>4</b> ) recorded in positive mode .....                     | 6 |
| <b>Figure S9.</b> $^1\text{H}$ NMR spectrum (400 MHz) of 4-chloroorcinol ( <b>5</b> ) in $\text{CDCl}_3$ .....        | 7 |
| <b>Figure S10.</b> ESI MS spectrum of 4-chloroorcinol ( <b>5</b> ) recorded in positive mode .....                    | 7 |

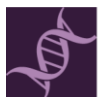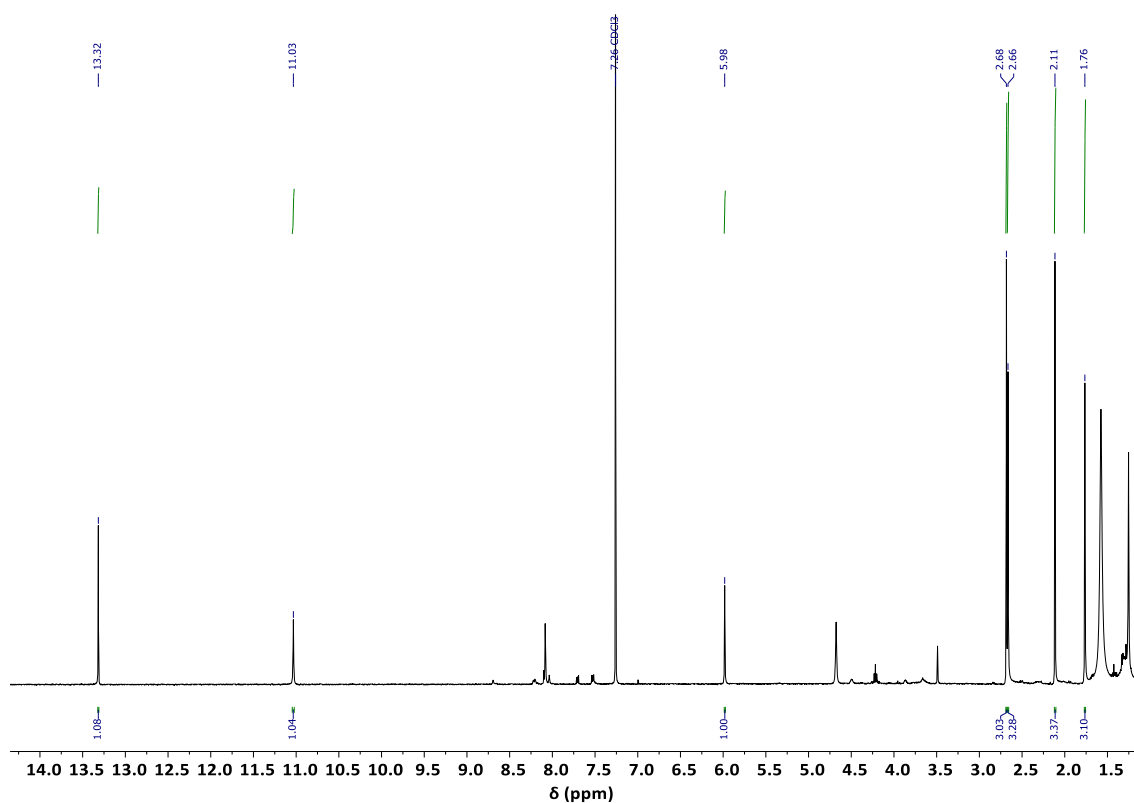

**Figure S1.**  $^1\text{H}$  NMR spectrum (400 MHz) of (+)-usnic acid (**1**) in  $\text{CDCl}_3$

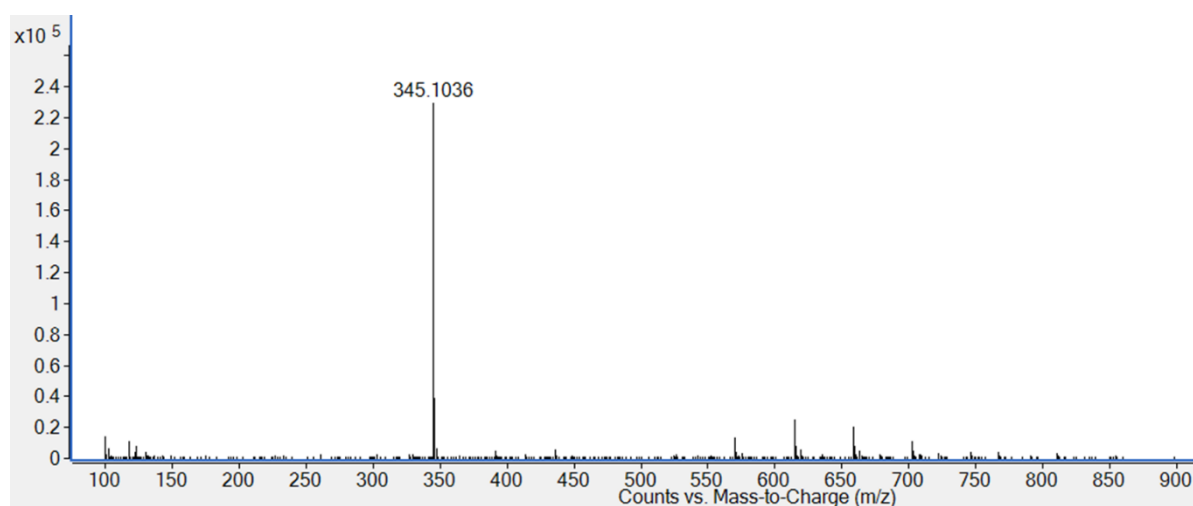

**Figure S2.** ESI MS spectrum of (+)-usnic acid (**1**) recorded in positive mode

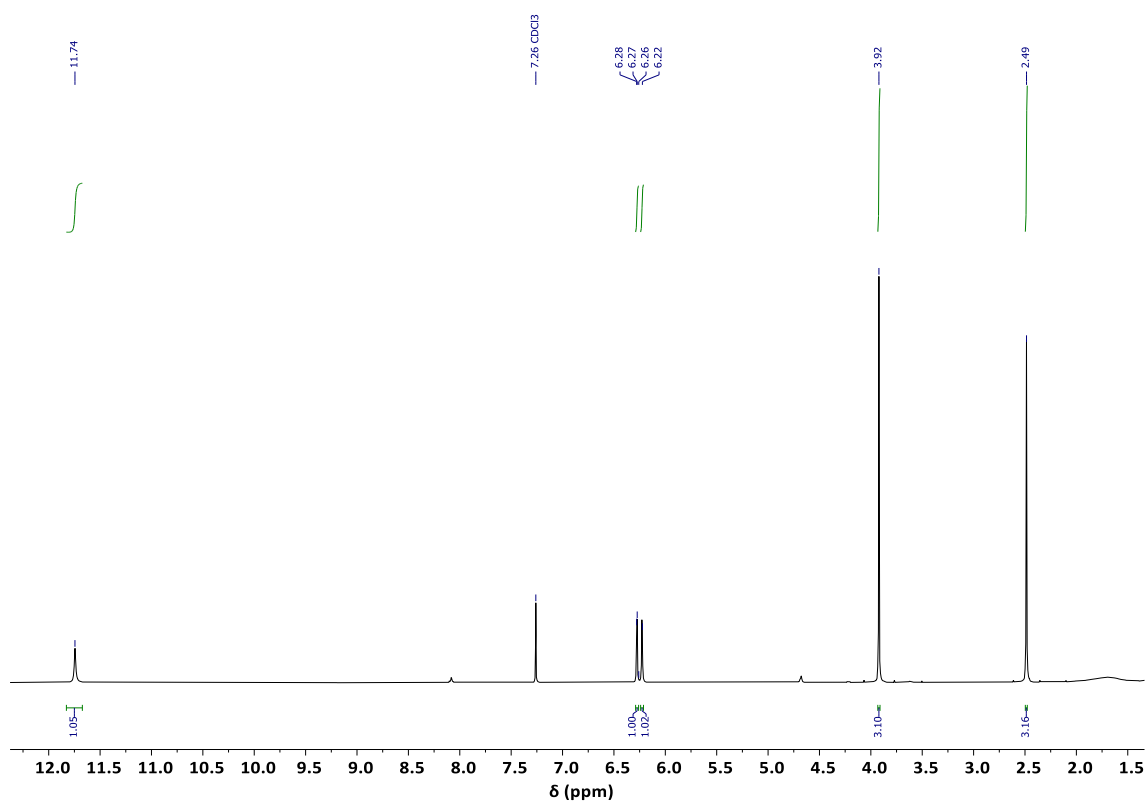

**Figure S3.**  $^1\text{H}$  NMR spectrum (500 MHz) of methyl orsellinate (**2**) in  $\text{CDCl}_3$

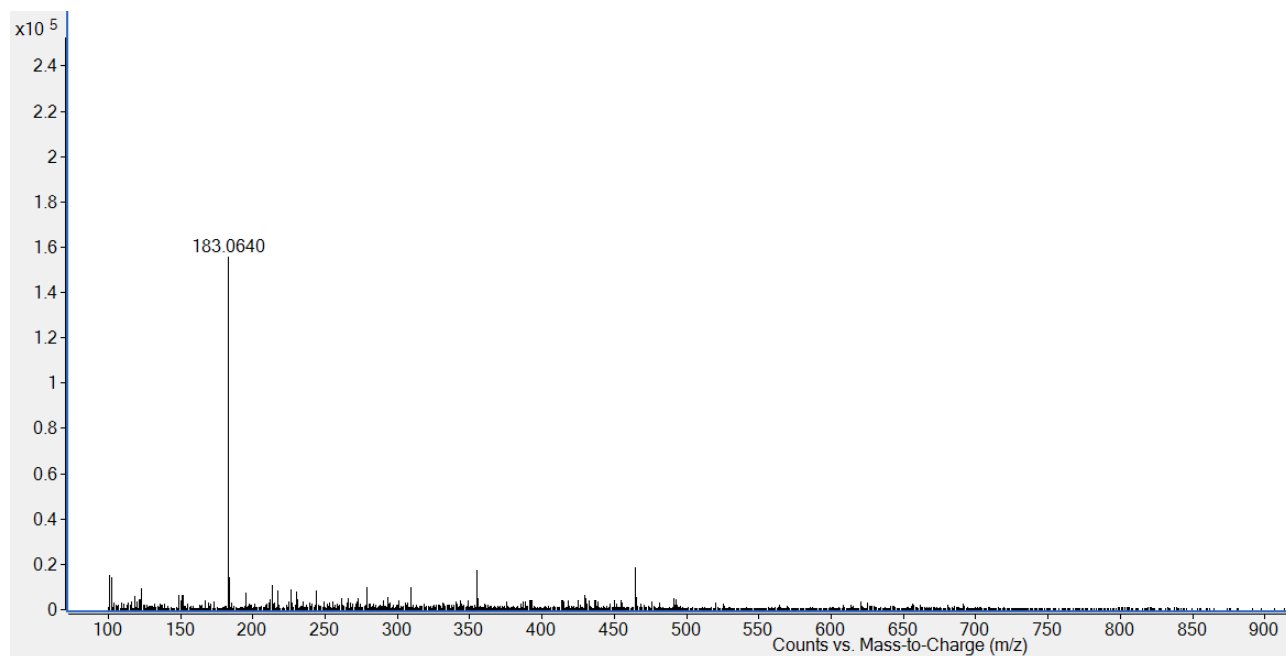

**Figure S4.** ESI MS spectrum of methyl orsellinate (**2**) recorded in positive mode

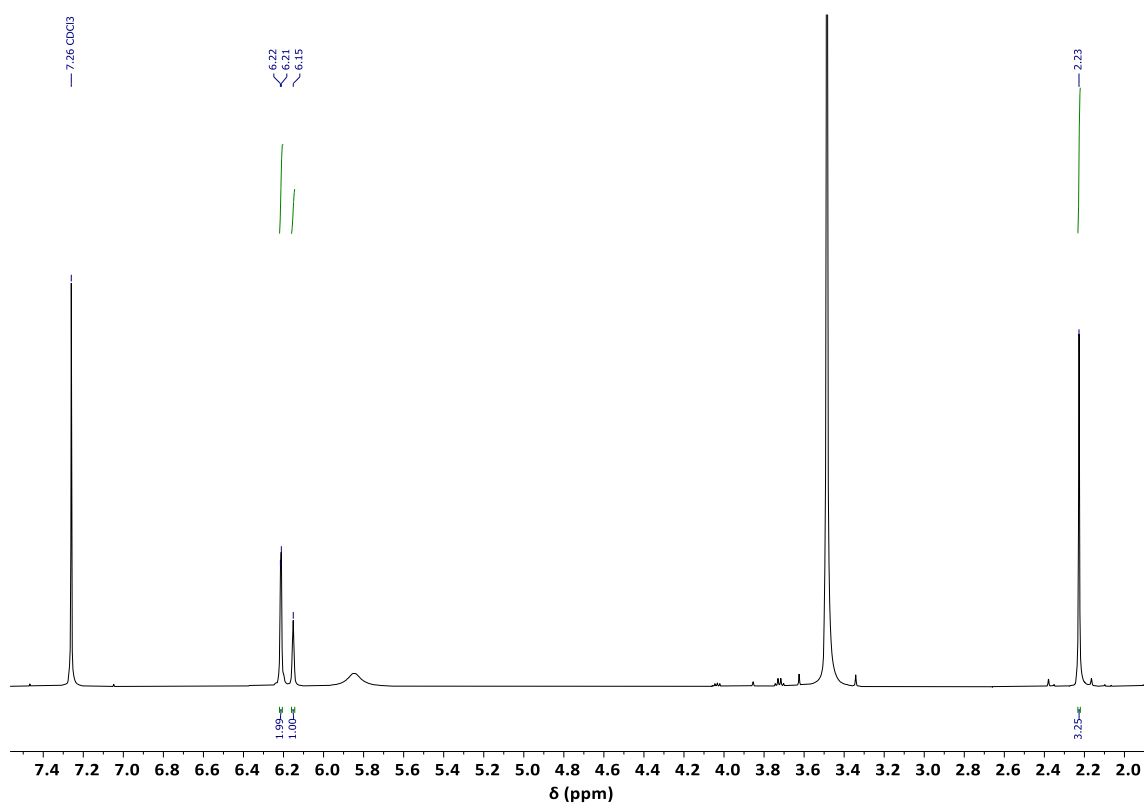

**Figure S5.**  $^1\text{H}$  NMR spectrum (500 MHz) of orcinol (**3**) in  $\text{CDCl}_3$

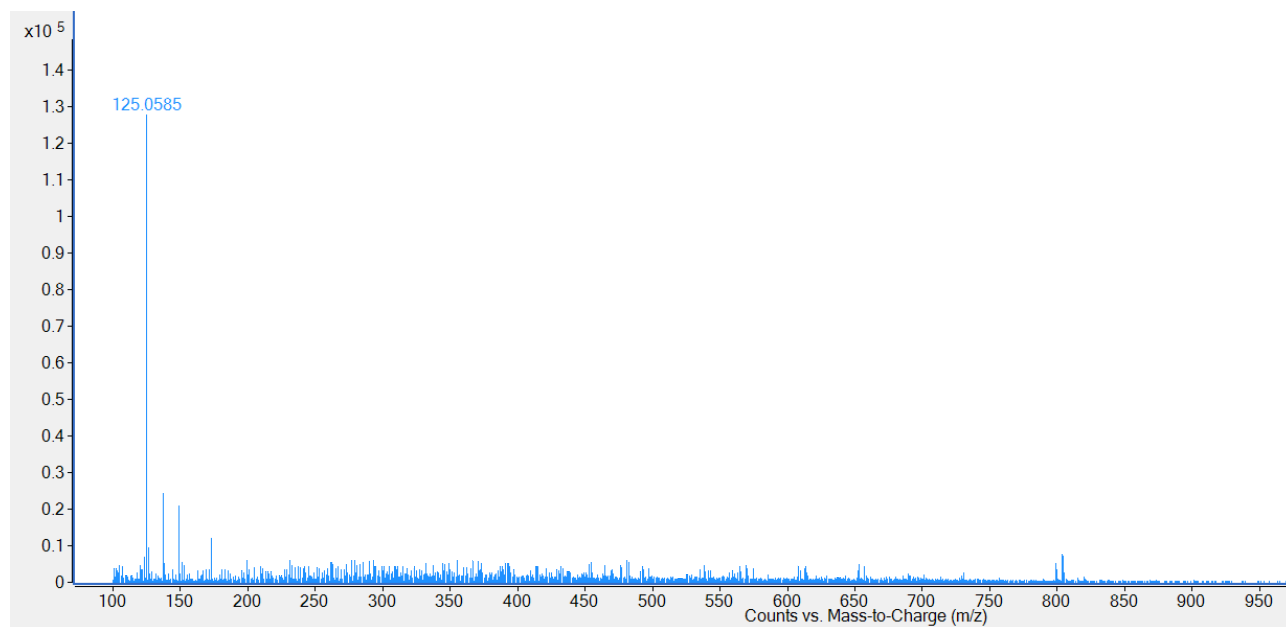

**Figure S6.** ESI MS spectrum of orcinol (**3**) recorded in positive mode

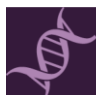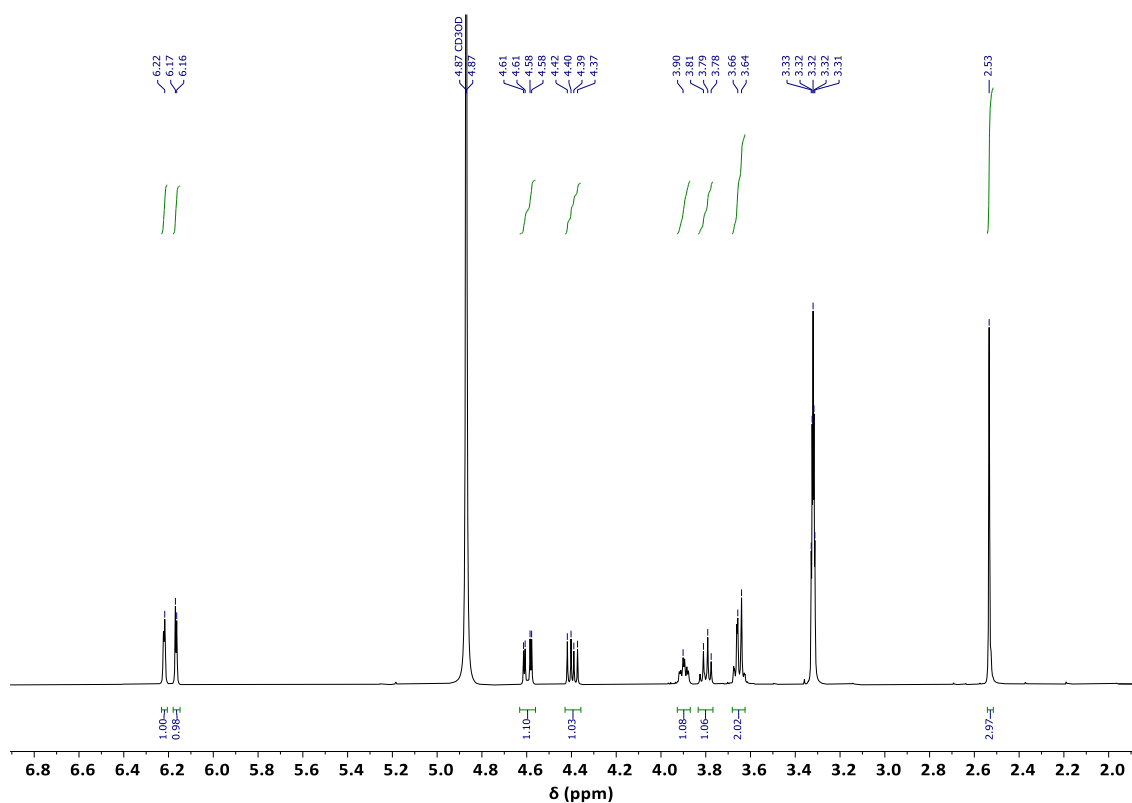

**Figure S7.**  $^1\text{H}$  NMR spectrum (400 MHz) of (+)-montagnetol (**4**) in  $\text{CD}_3\text{OD}$

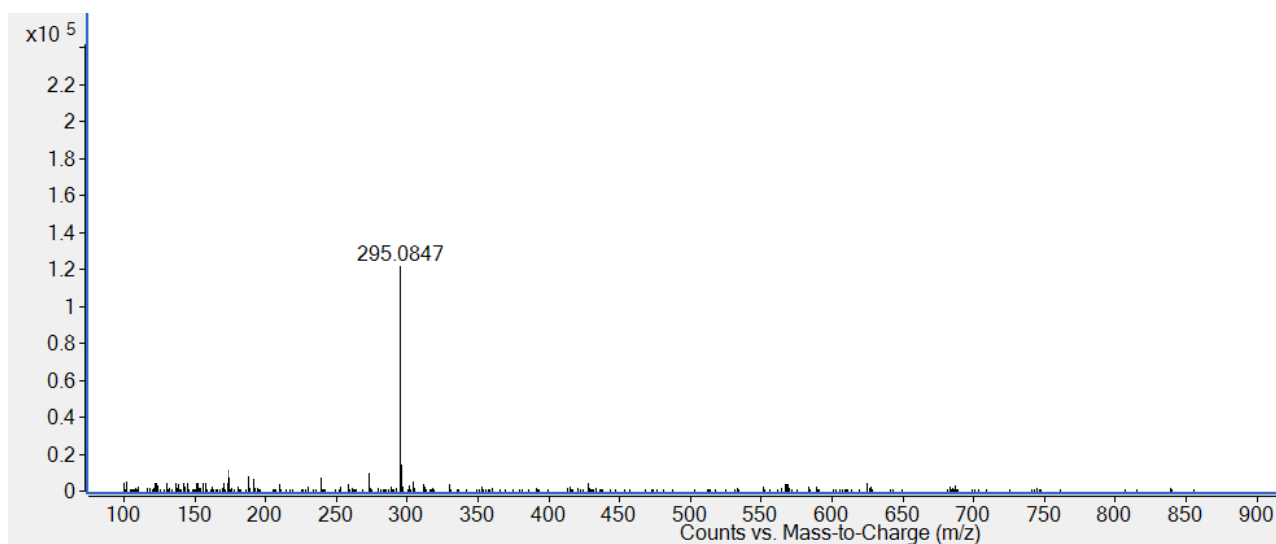

**Figure S8.** ESI MS spectrum of (+)-montagnetol (**4**) recorded in positive mode

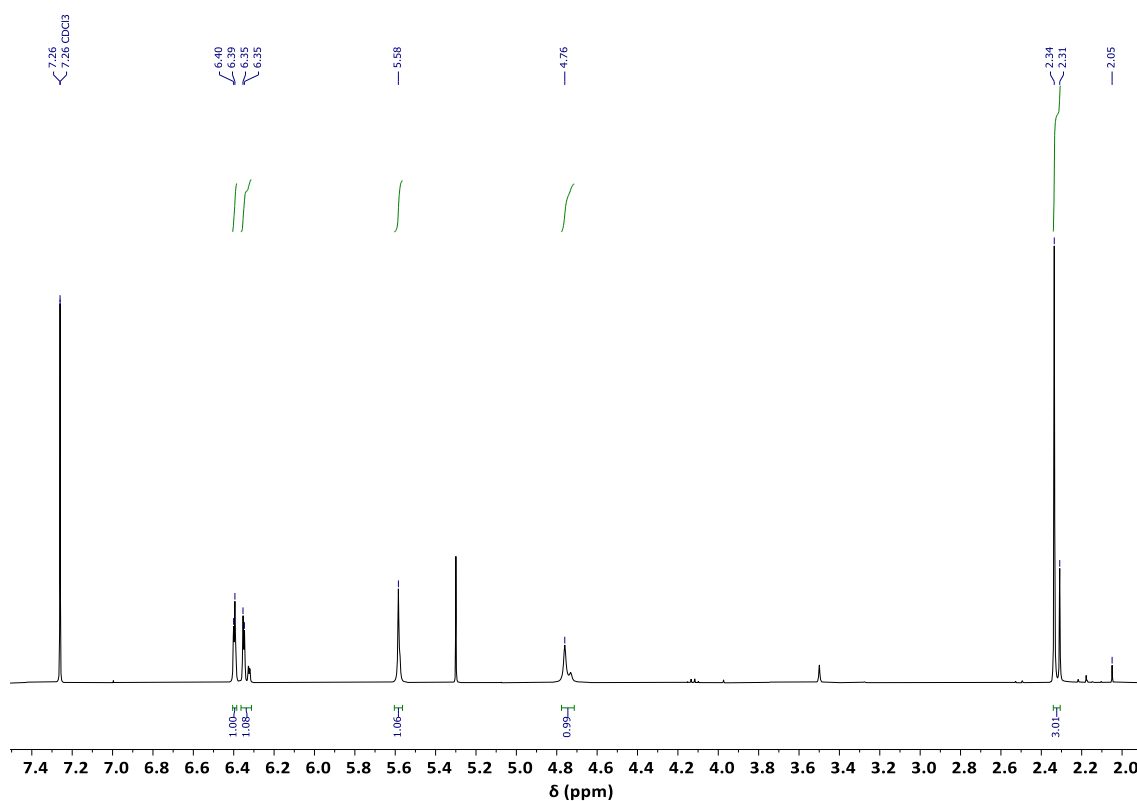

**Figure S9.**  $^1\text{H}$  NMR spectrum (400 MHz) of 4-chloroorcinol (**5**) in  $\text{CDCl}_3$

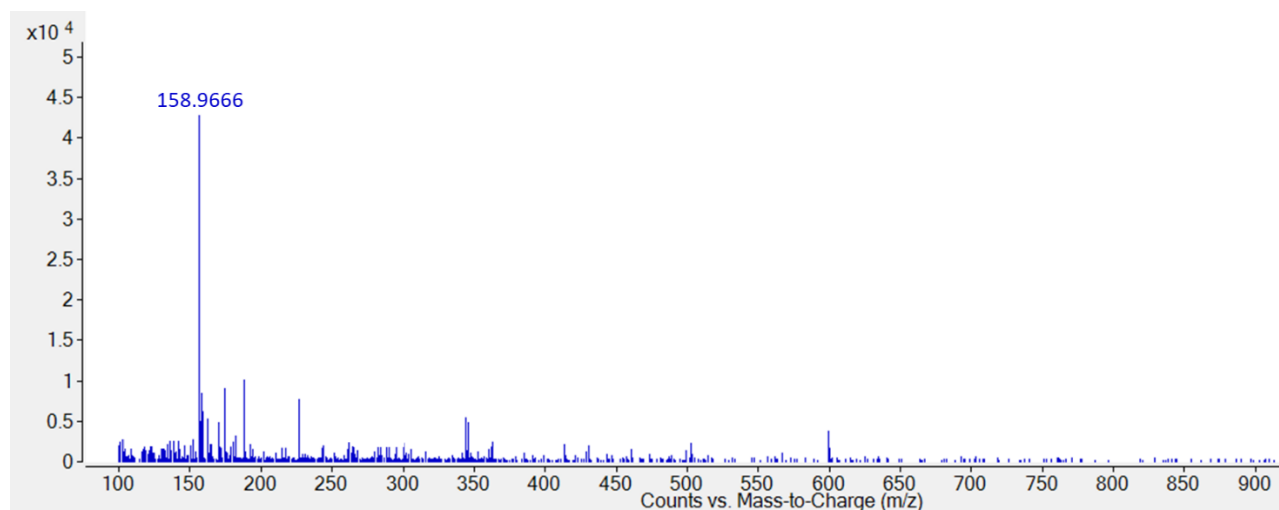

**Figure S10.** ESI MS spectrum of 4-chloroorcinol (**5**) recorded in positive mode
